# Supplementary material for: Modifying flexible polymer films towards superhydrophobicity and superoleophobicity by utilizing water-based nanohybrid coatings
Source: Royal Society of Chemistry journal article supplement (doi:10.1039/d2nr06780c), 2023-01-01
Supplement: d2nr06780c1.pdf [file d2nr06780c1.pdf]

# Supplementary Video Captions

## Modifying flexible polymer films towards superhydrophobicity and superoleophobicity

**Fanourios Krasanakis,<sup>1</sup> Thaleia-Michaela Chatzaki,<sup>1,2</sup> Kiriaki**

**Chrissopoulou<sup>1,\*</sup> and Spiros H. Anastasiadis<sup>1,2,\*</sup>**

<sup>1</sup> Institute of Electronic Structure and Laser, Foundation for Research and Technology-Hellas,  
711 10 Heraklion, Crete, Greece

<sup>2</sup> Department of Chemistry, University of Crete, 710 03 Heraklion, Crete, Greece

**Video S1:** Hysteresis measurement of a water drop on a neat LDPE film

**Video S2:** Hysteresis measurement of a water drop on a LDPE film coated with a nanocomposite containing 33% wt Silres BS 4004 and 67% wt ZL nanoparticles

**Video S3 (a and b):** Water repellence of a LDPE film coated with a nanocomposite containing 56% wt Dynasytan and 44% wt PG003. **(a)** tilted substrate at 5° and **(b)** untilted (horizontal) substrate
