# Supplementary material for: Modifying flexible polymer films towards superhydrophobicity and superoleophobicity by utilizing water-based nanohybrid coatings
Source: Royal Society of Chemistry journal article supplement (doi:10.1039/d2nr06780c), 2023-01-01
Supplement: d2nr06780c2.pdf [file d2nr06780c2.pdf]

# Supporting Information

## Modifying flexible polymer films towards superhydrophobicity and superoleophobicity

**Fanourios Krasanakis,<sup>1</sup> Thaleia-Michaela Chatzaki,<sup>1,2</sup> Kiriaki  
Chrissopoulou<sup>1,\*</sup> and Spiros H. Anastasiadis<sup>1,2,\*</sup>**

<sup>1</sup> Institute of Electronic Structure and Laser, Foundation for Research and Technology-  
Hellas, 711 10 Heraklion, Crete, Greece

<sup>2</sup> Department of Chemistry, University of Crete, 710 03 Heraklion, Crete, Greece

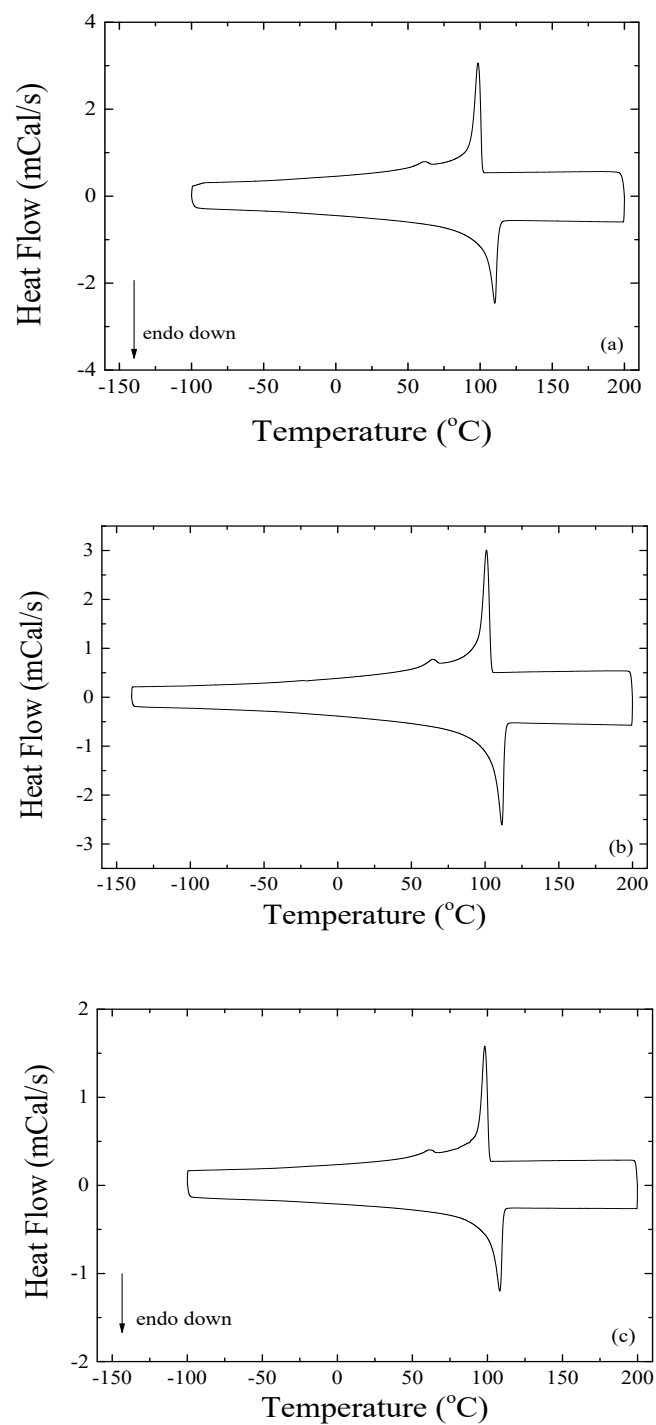

**Figure S1:** DSC thermographs of (a) neat LDPE film, (b) a LDPE film coated with a nanocomposite containing 77% wt Silres and 23% wt ZL film and (c) a LDPE film coated with a nanocomposite containing 56% wt Dynasylan SIVO 121 and 44% wt PG003 film.

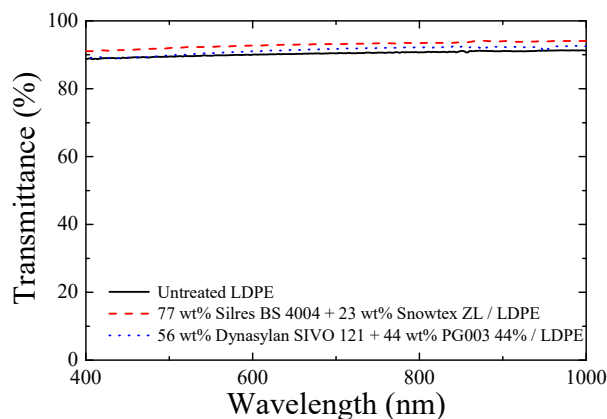

**Figure S2:** UV/Vis spectrum of a neat LDPE film (black solid line), of a LDPE film coated with a nanocomposite containing 67% wt Silres 4004 and 23% ZL (red dashed line) and of a LDPE film coated with a nanocomposite containing 56% wt Dynasytan SIVO 121 and 44% PG003 (blue dotted line)

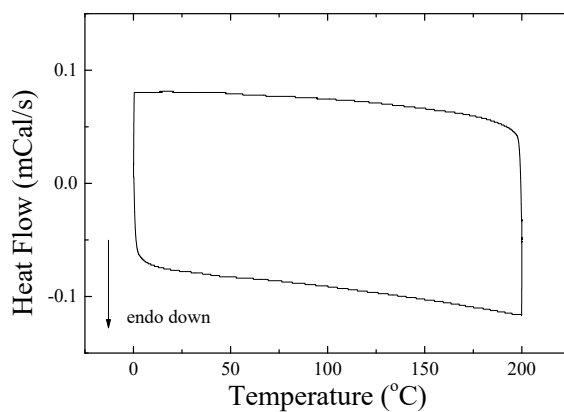

**Figure S3:** DSC thermograph of Silres BS 4004

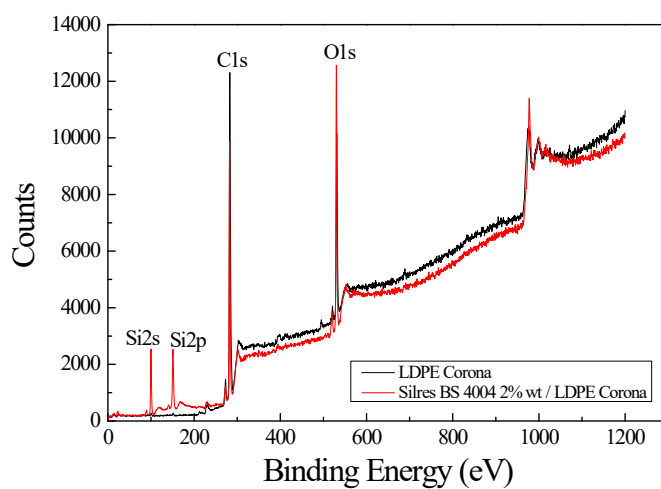

**Figure S4:** XPS survey spectra of corona treated LDPE and corona treated LDPE coated with Silres BS 4004 of 2 %wt concentration in water

**Table S1:** Surface atomic composition obtained by the analysis of the high-resolution XPS spectra for the LDPE Corona, the LDPE Corona coated with Silres BS 4004 of 2 %wt concentration in water and the LDPE Corona coated with the Dynasytan SIVO 121 of 1 %wt concentration in water

| Peaks | LDPE Corona | LDPE Corona coated with Silres BS 4004 | LDPE Corona coated with Dynasytan SIVO 121 |
|-------|-------------|----------------------------------------|--------------------------------------------|
| C     | 82.2%       | 58.7%                                  | 27.9%                                      |
| O     | 17.8%       | 22.7%                                  | 7.2%                                       |
| Si    | -           | 18.6%                                  | 3.9%                                       |
| F     | -           | -                                      | 61.0%                                      |

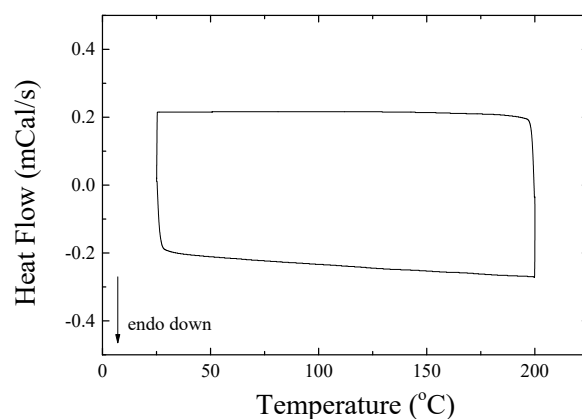

**Figure S5:** DSC thermograph of Dynasytan SIVO 121

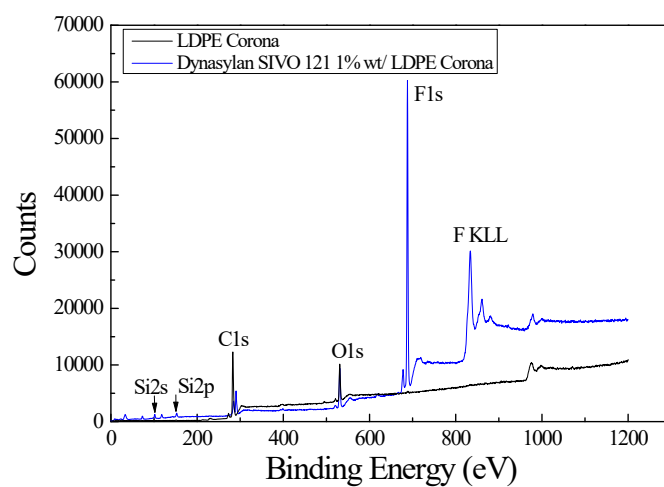

**Figure S6:** XPS survey spectra of corona treated LDPE and corona treated LDPE coated with Dynasytan SIVO 121 of 1 %wt concentration in water.
